# Supplementary material
Source: Springer Nature journal article supplement (https://www.springerprofessional.de/resource/supplementary/40327_2013_2_MOESM3_ESM.pdf/10801434)

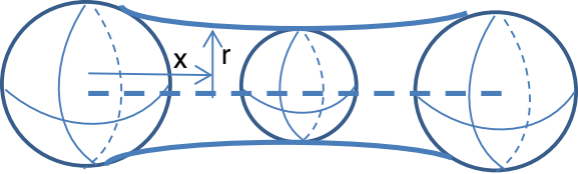

Supplement: MOESM3 [file 10801434]
